# Supplementary material
Source: Elsevier journal article supplement (https://www.sciencedirect.com/science/article/pii/S0025775317309132)
Supplement: mmc1 [file S0025775317309132:mmc1.pdf]

Table 1S. SNPs information and genotyping results for RA patients and controls.

| SNP ID     | Location | Allele | Amino Acid Change | MAF   |          |        |
|------------|----------|--------|-------------------|-------|----------|--------|
|            |          |        |                   | RA    | Controls | CEU    |
| rs10889677 | 3'-UTR   | C/A    |                   | 0.249 | 0.277    | 0.3926 |
| rs11209026 | Exon 9   | G/A    | Arg381Gln         | 0.05  | 0.047    | 0.0228 |
| rs2201841  | Intron   | A/G    |                   | 0.25  | 0.275    | 0.3954 |
